# Supplementary material for: Exome sequencing characterizes the somatic mutation spectrum of early serrated lesions in a patient with serrated polyposis syndrome (SPS)
Source: PubMed Central journal article supplement (PMC5707812; doi:10.1186/s13053-017-0082-9), 2017-11-29
Supplement: 13053_2017_82_MOESM1_ESM.pdf [file 13053_2017_82_MOESM1_ESM.pdf]

## Supplementary Tables

Horpaopan et al.

Exome sequencing characterizes the somatic mutation spectrum of early serrated lesions in a patient with serrated polyposis syndrome (SPS)

**Supplementary Table S1** Established causative or candidate genes for (hereditary) colorectal tumours and published genes related to serrated polyps (n = 74)

| No. | Gene             | Chr     | Disease / pathway / susceptibility                                                               | Ref.     |
|-----|------------------|---------|--------------------------------------------------------------------------------------------------|----------|
| 1   | <i>ACVR2</i>     | 2q22-23 | Target gene in MMR-deficient CRC                                                                 | [1]      |
| 2   | <i>AHBD1</i>     | 2       | Found LoF mutation in serrated polyposis families                                                | [2]      |
| 3   | <i>AIM2</i>      | 1q22    | Target gene in MMR-deficient CRC                                                                 | [1]      |
| 4   | <i>APC</i>       | 5q22.2  | Familial adenomatous polyposis (FAP)                                                             | [3]      |
| 5   | <i>APC2</i>      | 19p13.3 | Wnt signalling pathway, depletion of intracellular beta-catenin, specifically expressed in brain | [4]      |
| 6   | <i>AXIN1</i>     | 16p13.3 | Regulation of Wnt-beta-catenin signaling                                                         | [1]      |
| 7   | <i>AXIN2</i>     | 17q24   | Regulation of Wnt-beta-catenin signaling                                                         | [4, 5]   |
| 8   | <i>BAX</i>       | 19q13.3 | Target gene in MMR-deficient CRC                                                                 | [1]      |
| 9   | <i>BLM</i>       | 15q26.1 | Target gene in MMR-deficient CRC                                                                 | [1]      |
| 10  | <i>BMPR1A</i>    | 10q22.3 | Juvenile polyposis syndrome (JPS)                                                                | [4]      |
| 11  | <i>BRAF</i>      | 7q34    | Oncogene, somatic mutations in CRC                                                               | [6]      |
| 12  | <i>BUB1B</i>     | 15q15   | Gastrointestinal adenomas and carcinomas                                                         | [7]      |
| 13  | <i>CA9</i>       | 9p13.3  | Found LoF mutation in serrated polyposis families                                                | [2]      |
| 14  | <i>Caspase-5</i> | 11q22.2 | target gene in MMR-deficient CRC                                                                 | [1]      |
| 15  | <i>CASQ1</i>     | 1p3.2   | Found LoF mutation in serrated polyposis families                                                | [2]      |
| 16  | <i>CDH1</i>      | 16q22.1 | Hereditary diffuse gastric cancer (HDGC)                                                         | [8]      |
| 17  | <i>CDX2</i>      | 13q12.3 | target gene in MMR-deficient CRC                                                                 | [1]      |
| 18  | <i>CHEK2</i>     | 22q12.1 | Susceptibility for CRC                                                                           | [9, 10]  |
| 19  | <i>CHK1</i>      | 11q22   | Target gene in MMR-deficient CRC                                                                 | [1]      |
| 20  | <i>CNPY4</i>     | 7q22.1  | Found LoF mutation in serrated polyposis families                                                | [2]      |
| 21  | <i>COL15A1</i>   | 9q22.3  | Found LoF mutation in serrated polyposis families                                                | [2]      |
| 22  | <i>COL20A1</i>   | 20q13   | Found LoF mutation in serrated polyposis families                                                | [2]      |
| 23  | <i>CREB3L3</i>   | 19p13   | Found LoF mutation in serrated polyposis families                                                | [2]      |
| 24  | <i>CRYBA2</i>    | 2q35    | Frequently overexpressed in <i>BRF</i> -mutant colon cancer                                      | [11]     |
| 25  | <i>CTNNB1</i>    | 3p21    | canonical Wnt signaling pathway                                                                  | [12]     |
| 26  | <i>DDX31</i>     | 9q34    | Found LoF mutation in serrated polyposis families                                                | [2]      |
| 27  | <i>E2F-4</i>     | 16q21   | Target gene in MMR-deficient CRC                                                                 | [1]      |
| 28  | <i>EGFR</i>      | 7p12    | Oncogene, somatic mutations in lung cancer                                                       | [13, 14] |
| 29  | <i>EMR2</i>      | 19p13   | Found LoF mutation in serrated polyposis families                                                | [2]      |
| 30  | <i>ENDOG</i>     | 9q34.1  | Found LoF mutation in serrated polyposis families                                                | [2]      |
| 31  | <i>EPCAM</i>     | 2p21    | Lynch syndrome / HNPCC                                                                           | [15]     |
| 32  | <i>FAM123B</i>   | Xq11.2  | canonical Wnt signaling pathway                                                                  | [16, 17] |
| 33  | <i>FBXW7</i>     | 4q31.3  | Cyclin E degradation, frequently mutated in CRC                                                  | [4]      |
| 34  | <i>FLI1</i>      | 11q24.3 | Candidate serrated polyposis gene                                                                | [18]     |
| 35  | <i>FSCN1</i>     | 7p22.1  | Frequently overexpressed in <i>BRF</i> -mutant colon cancer                                      | [11]     |
| 36  | <i>FSIP2</i>     | 2q32.1  | Found LoF mutation in serrated polyposis families                                                | [2]      |

|    |                |          |                                                             |          |
|----|----------------|----------|-------------------------------------------------------------|----------|
| 37 | <i>GCA</i>     | 2q24.2   | Found LoF mutation in serrated polyposis families           | [2]      |
| 38 | <i>GCSAM</i>   | 3q13.2   | Found LoF mutation in serrated polyposis families           | [2]      |
| 39 | <i>GEM</i>     | 8q22     | Found LoF mutation in serrated polyposis families           | [2]      |
| 40 | <i>GJA3</i>    | 13q12.11 | Candidate serrated polyposis gene                           | [18]     |
| 41 | <i>GPT</i>     | 8q24.3   | Found LoF mutation in serrated polyposis families           | [2]      |
| 42 | <i>GREM1</i>   | 15q13.3  | Hereditary mixed polyposis syndrome 1                       | [8]      |
| 43 | <i>GRWD1</i>   | 19q13    | Found LoF mutation in serrated polyposis families           | [2]      |
| 44 | <i>GSK3B</i>   | 3q13.3   | Canonical Wnt signaling pathway                             | [5]      |
| 45 | <i>H3F3B</i>   | 17q25    | Found LoF mutation in serrated polyposis families           | [2]      |
| 46 | <i>HDAC2</i>   | 6q21     | Candidate serrated polyposis gene                           | [19]     |
| 47 | <i>HDHD3</i>   | 9q32     | Candidate serrated polyposis gene                           | [18]     |
| 48 | <i>hRAD50</i>  | 5q31     | Target gene in MMR-deficient CRC                            | [1]      |
| 49 | <i>IDO2</i>    | 8p11.21  | Found LoF mutation in serrated polyposis families           | [2]      |
| 50 | <i>IGF2</i>    | 11p15.5  | Candidate serrated polyposis gene                           | [19]     |
| 51 | <i>IGFBP7</i>  | 4q12     | Candidate serrated polyposis gene                           | [20]     |
| 52 | <i>IGFIIR</i>  | 6q26-27  | Target gene in MMR-deficient CRC                            | [1]      |
| 53 | <i>IGSF6</i>   | 16p12.2  | Found LoF mutation in serrated polyposis families           | [2]      |
| 54 | <i>IMPACT</i>  | 18q11    | Found LoF mutation in serrated polyposis families           | [2]      |
| 55 | <i>KRAS</i>    | 12p12.1  | Oncogene, frequently mutated in CRC                         | [6]      |
| 56 | <i>MAP2K4</i>  | 17p12    | MAPK pathway, mutated in CRC                                | [21, 22] |
| 57 | <i>MBD4</i>    | 3q21-q22 | target gene in MMR-deficient CRC                            | [1]      |
| 58 | <i>MGAT5B</i>  | 17q25    | Found LoF mutation in serrated polyposis families           | [2]      |
| 59 | <i>MGMT</i>    | 10q26.3  | Candidate serrated polyposis gene                           | [23]     |
| 60 | <i>MLH1</i>    | 3p22.2   | Candidate serrated polyposis gene                           | [20]     |
| 61 | <i>MLH3</i>    | 14q24.3  | Candidate serrated polyposis gene                           | [23]     |
| 62 | <i>MSH2</i>    | 2p21     | Candidate serrated polyposis gene                           | [23]     |
| 63 | <i>MSH3</i>    | 5q11-q12 | Target gene in MMR-deficient CRC                            | [1]      |
| 64 | <i>MSH6</i>    | 2p16.3   | Candidate serrated polyposis gene                           | [23]     |
| 65 | <i>MUC6</i>    | 11p15    | Frequently overexpressed in <i>BRF</i> -mutant colon cancer | [11]     |
| 66 | <i>MUTYH</i>   | 1p32-34  | <i>MUTYH</i> -associated polyposis (MAP)                    | [24]     |
| 67 | <i>MYH15</i>   | 3q13.1   | Found LoF mutation in serrated polyposis families           | [2]      |
| 68 | <i>NCAN</i>    | 19p13    | Found LoF mutation in serrated polyposis families           | [2]      |
| 69 | <i>NRAS</i>    | 1p13.2   | Noonan syndrome, rarely mutated in CRC                      | [25]     |
| 70 | <i>OR4L1</i>   | 14q11    | Found LoF mutation in serrated polyposis families           | [2]      |
| 71 | <i>PDGFRA</i>  | 4q12     | Upregulated in CRC                                          | [26]     |
| 72 | <i>PECR</i>    | 2q35     | Found LoF mutation in serrated polyposis families           | [2]      |
| 73 | <i>PIK3CA</i>  | 3q26.3   | Cowden syndrome, frequently mutated in CRC                  | [4, 27]  |
| 74 | <i>PMS2</i>    | 7p22.1   | Candidate serrated polyposis gene                           | [23]     |
| 75 | <i>POLD1</i>   | 19q13.3  | Hereditary multiple adenomas / CRC                          | [28]     |
| 76 | <i>POLD2</i>   | 7p13     | Candidate for hereditary multiple adenomas / CRC            | [28]     |
| 77 | <i>POLD3</i>   | 11q14    | Candidate for hereditary multiple adenomas / CRC            | [28]     |
| 78 | <i>POLD4</i>   | 11q13    | Candidate for hereditary multiple adenomas / CRC            | [28]     |
| 79 | <i>POLE</i>    | 12q24.3  | Hereditary multiple adenomas / CRC                          | [28]     |
| 80 | <i>POLE2</i>   | 14q21    | Candidate for hereditary multiple adenomas / CRC            | [28]     |
| 81 | <i>POLE3</i>   | 9q33     | Candidate for hereditary multiple adenomas / CRC            | [28]     |
| 82 | <i>POLE4</i>   | 2p12     | Candidate for hereditary multiple adenomas / CRC            | [28]     |
| 83 | <i>PPP2R1B</i> | 11q23    | MAPK pathway, candidate TSG, frequently mutated in CRC      | [5]      |
| 84 | <i>PQLC1</i>   | 18q23    | Candidate serrated polyposis gene                           | [18]     |
| 85 | <i>PTEN</i>    | 10q23.3  | Target gene in MMR-deficient CRC                            | [1]      |
| 86 | <i>PTPN13</i>  | 4q21     | Found LoF mutation in serrated polyposis families           | [2]      |
| 87 | <i>PTPRJ</i>   | 11p11.2  | Frequently mutated in colorectal adenomas / CRC             | [8]      |

|     |                       |          |                                                             |          |
|-----|-----------------------|----------|-------------------------------------------------------------|----------|
| 88  | <i>PWP2</i>           | 21q22    | Found LoF mutation in serrated polyposis families           | [2]      |
| 89  | <i>RASL10B</i>        | 17q12    | Candidate serrated polyposis gene                           | [18]     |
| 90  | <i>RGS19</i>          | 20q13    | Found LoF mutation in serrated polyposis families           | [2]      |
| 91  | <i>RIZ</i>            | 1p36     | Target gene in MMR-deficient CRC                            | [1]      |
| 92  | <i>RNF43</i>          | 17q22    | Play a role in serrated neoplasia pathway                   | [2]      |
| 93  | <i>SEC16B</i>         | 1q25.2   | Found LoF mutation in serrated polyposis families           | [2]      |
| 94  | <i>SEEL</i>           | 13q22.3  | Found LoF mutation in serrated polyposis families           | [2]      |
| 95  | <i>SEC63</i>          | 6q21     | Target gene in MMR-deficient CRC                            | [1]      |
| 96  | <i>SEMG1</i>          | 20q13    | Frequently overexpressed in <i>BRF</i> -mutant colon cancer | [11]     |
| 97  | <i>SFRP1</i>          | 8p11.21  | Candidate serrated polyposis gene                           | [19, 29] |
| 98  | <i>SLC22A2</i>        | 6q25.3   | Found LoF mutation in serrated polyposis families           | [2]      |
| 99  | <i>SLC26A2</i>        | 5q32     | Candidate serrated polyposis gene                           | [18]     |
| 100 | <i>SLC27A6</i>        | 5q23.3   | Found LoF mutation in serrated polyposis families           | [2]      |
| 101 | <i>SLC30A7</i>        | 1p21.2   | Found LoF mutation in serrated polyposis families           | [2]      |
| 102 | <i>SLIT2</i>          | 4p15.31  | Marker for CIMP                                             | [23]     |
| 103 | <i>SMAD2</i>          | 18q21.1  | TGF-beta signaling pathway, frequently mutated in CRC       | [4]      |
| 104 | <i>SMAD4</i>          | 18q21.1  | Juvenile polyposis syndrome (FJP)                           | [4]      |
| 105 | <i>SSNA1</i>          | 9q34.3   | Found LoF mutation in serrated polyposis families           | [2]      |
| 106 | <i>ST6GALNA<br/>C</i> | 9q34.11  | Found LoF mutation in serrated polyposis families           | [2]      |
| 107 | <i>STK11</i>          | 19p13.3  | Target gene in MMR-deficient CRC                            | [1]      |
| 108 | <i>SYTL1</i>          | 1p36.11  | Found LoF mutation in serrated polyposis families           | [2]      |
| 109 | <i>TAS2R3</i>         | 7q34     | Found LoF mutation in serrated polyposis families           | [2]      |
| 110 | <i>TBP</i>            | 6q27     | Target gene in MMR-deficient CRC                            | [1]      |
| 111 | <i>TCF4</i>           | 10q25.3  | Target gene in MMR-deficient CRC                            | [1]      |
| 112 | <i>TGFBR2</i>         | 3p22     | Target gene in MMR-deficient CRC                            | [1]      |
| 113 | <i>TP53</i>           | 17p13.1  | Li-Fraumeni syndrome                                        | [1]      |
| 114 | <i>TRNP1</i>          | 1p36     | Frequently overexpressed in <i>BRF</i> -mutant colon cancer | [11]     |
| 115 | <i>USP45</i>          | 6q16.2   | Found LoF mutation in serrated polyposis families           | [2]      |
| 116 | <i>WIF1</i>           | 12q14.3  | Inhibitor of Wnt signaling pathway                          | [29]     |
| 117 | <i>WRN</i>            | 8p12     | Candidate serrated polyposis gene                           | [19]     |
| 118 | <i>ZIC2</i>           | 13q32    | Frequently overexpressed in <i>BRF</i> -mutant colon cancer | [11]     |
| 119 | <i>ZIC5</i>           | 13q32    | Frequently overexpressed in <i>BRF</i> -mutant colon cancer | [11]     |
| 120 | <i>ZNF491</i>         | 19p13.2  | Found LoF mutation in serrated polyposis families           | [2]      |
| 121 | <i>ZNF568</i>         | 19q13.12 | Found LoF mutation in serrated polyposis families           | [2]      |
| 122 | <i>ZNF614</i>         | 19q13.41 | Found LoF mutation in serrated polyposis families           | [2]      |
| 123 | <i>ZNF860</i>         | 3p23     | Found LoF mutation in serrated polyposis families           | [2]      |

CRC, colorectal cancer; HNPCC, hereditary nonpolyposis colorectal cancer; LoF, loss of function; MMR, mismatch repair

**Supplementary Table S2** Primers used for validating 25 variants by Sanger sequencing

| No. | Gene                  | Chr | Position  | Ref | Allele | Mut cDNA   | Protein  | Tu-ID  | Forward primer (5'-3')  | Reverse primer (5'-3')   | size |
|-----|-----------------------|-----|-----------|-----|--------|------------|----------|--------|-------------------------|--------------------------|------|
| 1   | ABI3BP <sup>#</sup>   | 3   | 100499047 | T   | A      | c.2036A>T  | p.K679M  | 71     | GTTTCAGAGCTGAGCTGTCA    | CTGGCAACTCTACCAAGTTTC    | 196  |
| 2   | CALD1 <sup>#</sup>    | 7   | 134617870 | G   | A      | c.332G>A   | p.R111Q  | 69     | AGTGAAGGGGATGATGAGG     | GAGCGACAGACTTGTCATCTGT   | 136  |
| 3   | CATSPERB <sup>#</sup> | 14  | 92084032  | G   | T      | c.2309C>A  | p.P770H  | 71     | TACATAACTGTCAGTATCATCAA | CCTTCAGAATAGATTCAGTTG    | 213  |
| 4   | CCBP2 <sup>#</sup>    | 3   | 42906178  | A   | T      | c.184A>T   | p.S62C   | 72     | GGTGTCTTTGGCAAAGTCT     | GGCAGTGTACCAGAAACAG      | 177  |
| 5   | CENPQ                 | 6   | 49459907  | G   | T      | c.726G>T   | p.L242F  | 79     | GCGATTCGTTGACAATTATTG   | GGTTGACATGCTCTTCATCTG    | 224  |
| 6   | CNTN5                 | 11  | 99942566  | G   | T      | c.1429G>T  | p.A477S  | 70     | GCTGGAATGTATCAGTGTGG    | AATTAGAGCATGAAAAGAAGCAAG | 135  |
| 7   | COL8A1 <sup>#</sup>   | 3   | 99513118  | G   | A      | c.373G>A   | p.E125K  | 71     | CATACCCCTTCTCTCTCTCTCT  | CCTTTAATTCCAGGTATCCCAT   | 144  |
| 8   | CPZ                   | 4   | 8621320   | G   | T      | c.1935G>T  | p.R645S  | 69, 71 | CCACATTGTCATTGCCCAA     | CTTTGTGGGATGTCTGTGGC     | 415  |
| 9   | CSPG4                 | 15  | 75968509  | G   | T      | c.6351C>A  | p.D2117E | 69     | CCACAGCTCCAGAGTGAGAC    | CTAGATGCTGGCGAGCTGG      | 240  |
| 10  | DNAI1 <sup>#</sup>    | 9   | 34506717  | G   | A      | c.1156G>A  | p.V386I  | 71     | AAGAACCCAGCTTCCCTGA     | TTGGCTGAGCTGCAGAAGGA     | 170  |
| 11  | FBLN5                 | 14  | 92349339  | G   | T      | c.821C>A   | p.P274H  | 69     | ACAGCCTTACCTTGGCAGCTT   | TCTCTGAGTTCCTTGCCAACA    | 115  |
| 12  | KIAA1033              | 12  | 105558425 | G   | T      | c.3361G>T  | p.E1121* | 79     | TTGGTATTTGCCATAATAAGTA  | TAAACCACTCACTGACCTTC     | 177  |
| 13  | KLHDC1                | 14  | 50201340  | G   | T      | c.857G>T   | p.C286F  | 78     | ATTGTATCCAGAGACCTAATCT  | GAAAGATATCCTTCTCAATGGC   | 242  |
| 14  | NEURL1B               | 5   | 172096909 | G   | T      | c.153G>T   | p.R51R   | 80     | AGGAGTTCGGAGGAGGCCTAAC  | ATCGTGCGGGTGAAGCCGAA     | 330  |
| 15  | NOL11                 | 17  | 65716083  | G   | T      | c.312+5G>T | SS       | 80     | GTTGTACACGATAATAAGGTGAG | GAATGAAAACCTGATTAGGACCT  | 324  |
| 16  | PPP3CB                | 10  | 75230956  | G   | T      | c.681C>A   | p.F227L  | 71     | TCGGACCATAACAAGTCACAC   | TTGGTATCGTTTTCTATGCAC    | 138  |
| 17  | PROB1                 | 5   | 138728291 | G   | T      | c.2480C>A  | p.P827H  | 78     | CGCTCCCTGGGAGGGGCTTT    | TAGGGCCAGCAGGGGTCCGAT    | 239  |
| 18  | PRR23A                | 3   | 138725070 | G   | T      | c.41C>A    | p.P14H   | 73     | TGGCGGGAGCTCCAGCACCA    | CGCTCCCTACGTCCTCTGCTA    | 296  |
| 19  | RAPH1                 | 2   | 204305718 | G   | T      | c.2195C>A  | p.P732Q  | 71     | GCTGAACCTGATGGATCTTCAG  | CAATGGAGTTGTTCCACCAC     | 146  |
| 20  | RGS13                 | 1   | 192613504 | G   | T      | c.40G>T    | p.D14Y   | 73     | CCCAGTGACTGTATTCCATTAAC | CATATGACTGCTCTTCTGATGAA  | 365  |
| 21  | RIF1                  | 2   | 152321774 | G   | T      | c.5740G>T  | p.A1914S | 78, 79 | CCCCAAAATGGAAGTCTGAG    | GGTCTCTCTTGTCCATGAAAG    | 140  |
| 22  | SLC27A3               | 1   | 153748613 | G   | T      | c.781G>T   | p.G261C  | 79     | GTTTCTGTGGCTCTGGTTCCG   | GTTCCGGAGCTCCAGCCTTA     | 151  |
| 23  | TRIM13                | 13  | 50587208  | G   | T      | c.1132G>T  | p.G378W  | 69     | TGGTCTACCATGTTCTAG      | ACCAAATCTGAATTACACTCT    | 308  |
| 24  | UBE2CBP               | 6   | 83732195  | G   | T      | c.823C>A   | p.Q275K  | 80     | GAGACCTTGGATTCTAGGCT    | CAGGTCTGGTTTGTCCAGAG     | 162  |

|    |        |   |           |   |   |          |        |    |                       |                      |     |
|----|--------|---|-----------|---|---|----------|--------|----|-----------------------|----------------------|-----|
| 25 | VGLL2# | 6 | 117589395 | C | A | c.132C>A | p.S44R | 70 | ATCAGTCTGAACCGAATTTGC | TTATACTGGCTGGGGTTTGG | 176 |
|----|--------|---|-----------|---|---|----------|--------|----|-----------------------|----------------------|-----|

# mutations were validated

## References

1. Grady WM, Carethers JM: **Genomic and epigenetic instability in colorectal cancer pathogenesis.** *Gastroenterology* 2008, **135**(4):1079-1099.
2. Yan HH, Lai JC, Ho SL, Leung WK, Law WL, Lee JF, Chan AK, Tsui WY, Chan AS, Lee BC *et al*: **RNF43 germline and somatic mutation in serrated neoplasia pathway and its association with BRAF mutation.** *Gut* 2016.
3. Groden J, Thliveris A, Samowitz W, Carlson M, Gelbert L, Albertsen H, Joslyn G, Stevens J, Spirio L, Robertson M *et al*: **Identification and characterization of the familial adenomatous polyposis coli gene.** *Cell* 1991, **66**(3):589-600.
4. Sjoblom T, Jones S, Wood LD, Parsons DW, Lin J, Barber TD, Mandelker D, Leary RJ, Ptak J, Silliman N *et al*: **The consensus coding sequences of human breast and colorectal cancers.** *Science* 2006, **314**(5797):268-274.
5. Suraweera N, Robinson J, Volikos E, Guenther T, Talbot I, Tomlinson I, Silver A: **Mutations within Wnt pathway genes in sporadic colorectal cancers and cell lines.** *Int J Cancer* 2006, **119**(8):1837-1842.
6. O'Brien MJ, Yang S, Mack C, Xu H, Huang CS, Mulcahy E, Amoroso M, Farrar FA: **Comparison of microsatellite instability, CpG island methylation phenotype, BRAF and KRAS status in serrated polyps and traditional adenomas indicates separate pathways to distinct colorectal carcinoma end points.** *Am J Surg Pathol* 2006, **30**(12):1491-1501.
7. de Voer RM, Geurts van Kessel A, Weren RD, Ligtenberg MJ, Smeets D, Fu L, Vreede L, Kamping EJ, Verwiel ET, Hahn MM *et al*: **Germline mutations in the spindle assembly checkpoint genes BUB1 and BUB3 are risk factors for colorectal cancer.** *Gastroenterology* 2013, **145**(3):544-547.
8. Venkatchalam R, Verwiel ET, Kamping EJ, Hoenselaar E, Gorgens H, Schackert HK, van Krieken JH, Ligtenberg MJ, Hoogerbrugge N, van Kessel AG *et al*: **Identification of candidate predisposing copy number variants in familial and early-onset colorectal cancer patients.** *Int J Cancer* 2011, **129**(7):1635-1642.
9. Suchy J, Cybulski C, Wokolorczyk D, Oszurek O, Gorski B, Debniak T, Jakubowska A, Gronwald J, Huzarski T, Byrski T *et al*: **CHEK2 mutations and HNPCC-related colorectal cancer.** *Int J Cancer* 2010, **126**(12):3005-3009.
10. Cybulski C, Wokolorczyk D, Kladny J, Kurzawski G, Suchy J, Grabowska E, Gronwald J, Huzarski T, Byrski T, Gorski B *et al*: **Germline CHEK2 mutations and colorectal cancer risk: different effects of a missense and truncating mutations?** *Eur J Hum Genet* 2007, **15**(2):237-241.
11. Kanth P, Bronner MP, Boucher KM, Burt RW, Neklason DW, Hagedorn CH, Delker DA: **Gene Signature in Sessile Serrated Polyps Identifies Colon Cancer Subtype.** *Cancer Prev Res (Phila)* 2016, **9**(6):456-465.
12. Pendas-Franco N, Aguilera O, Pereira F, Gonzalez-Sancho JM, Munoz A: **Vitamin D and Wnt/beta-catenin pathway in colon cancer: role and regulation of DICKKOPF genes.** *Anticancer Res* 2008, **28**(5A):2613-2623.
13. Pastorino U, Sozzi G, Miozzo M, Tagliabue E, Pilotti S, Pierotti MA: **Genetic changes in lung cancer.** *J Cell Biochem Suppl* 1993, **17F**:237-248.
14. Kim MJ, Lee EJ, Suh JP, Chun SM, Jang SJ, Kim DS, Lee DH, Lee SH, Youk EG: **Traditional serrated adenoma of the colorectum: clinicopathologic implications and endoscopic findings of the precursor lesions.** *Am J Clin Pathol* 2013, **140**(6):898-911.
15. Kuiper RP, Vissers LE, Venkatchalam R, Bodmer D, Hoenselaar E, Goossens M, Haufe A, Kamping E, Niessen RC, Hogervorst FB *et al*: **Recurrence and variability of germline EPCAM deletions in Lynch syndrome.** *Hum Mutat* 2011, **32**(4):407-414.
16. Sanz-Pamplona R, Lopez-Doriga A, Pare-Brunet L, Lazaro K, Bellido F, Alonso MH, Ausso S, Guino E, Beltran S, Castro-Giner F *et al*: **Exome Sequencing Reveals AMER1 as a Frequently Mutated Gene in Colorectal Cancer.** *Clin Cancer Res* 2015, **21**(20):4709-4718.
17. Major MB, Camp ND, Berndt JD, Yi X, Goldenberg SJ, Hubbert C, Biechele TL, Gingras AC, Zheng N, Maccoss MJ *et al*: **Wilms tumor suppressor WTX negatively regulates WNT/beta-catenin signaling.** *Science* 2007, **316**(5827):1043-1046.

18. Inoue M, Takahashi S, Soeda H, Shimodaira H, Watanabe M, Miura K, Sasaki I, Kato S, Ishioka C: **Gene-expression profiles correlate with the efficacy of anti-EGFR therapy and chemotherapy for colorectal cancer.** *Int J Clin Oncol* 2015, **20**(6):1147-1155.
19. Esteller M: **Epigenetics in cancer.** *N Engl J Med* 2008, **358**(11):1148-1159.
20. Kaji E, Uraoka T, Kato J, Hiraoka S, Suzuki H, Akita M, Saito S, Tanaka T, Ohara N, Yamamoto K: **Externalization of saw-tooth architecture in small serrated polyps implies the presence of methylation of IGFBP7.** *Dig Dis Sci* 2012, **57**(5):1261-1270.
21. Leary RJ, Lin JC, Cummins J, Boca S, Wood LD, Parsons DW, Jones S, Sjoblom T, Park BH, Parsons R *et al*: **Integrated analysis of homozygous deletions, focal amplifications, and sequence alterations in breast and colorectal cancers.** *Proc Natl Acad Sci U S A* 2008, **105**(42):16224-16229.
22. Lee JW, Soung YH, Kim SY, Nam SW, Park WS, Lee JY, Yoo NJ, Lee SH: **Kinase domain mutation of MAP2K4 is rare in gastric, colorectal and lung carcinomas.** *Pathology* 2006, **38**(3):263-264.
23. Beggs AD, Jones A, Shepherd N, Arnaout A, Finlayson C, Abulafi AM, Morton DG, Matthews GM, Hodgson SV, Tomlinson IP: **Loss of expression and promoter methylation of SLIT2 are associated with sessile serrated adenoma formation.** *PLoS Genet* 2013, **9**(5):e1003488.
24. Al-Tassan N, Chmiel NH, Maynard J, Fleming N, Livingston AL, Williams GT, Hodges AK, Davies DR, David SS, Sampson JR *et al*: **Inherited variants of MYH associated with somatic G:C-->T:A mutations in colorectal tumors.** *Nat Genet* 2002, **30**(2):227-232.
25. Irahara N, Baba Y, Nosho K, Shima K, Yan L, Dias-Santagata D, Iafrate AJ, Fuchs CS, Haigis KM, Ogino S: **NRAS mutations are rare in colorectal cancer.** *Diagn Mol Pathol* 2010, **19**(3):157-163.
26. Dai YC, Zhu XS, Nan QZ, Chen ZX, Xie JP, Fu YK, Lin YY, Lian QN, Sang QF, Zhan XJ: **Identification of differential gene expressions in colorectal cancer and polyp by cDNA microarray.** *World J Gastroenterol* 2012, **18**(6):570-575.
27. Nosho K, Kawasaki T, Ohnishi M, Suemoto Y, Kirkner GJ, Zepf D, Yan L, Longtine JA, Fuchs CS, Ogino S: **PIK3CA mutation in colorectal cancer: relationship with genetic and epigenetic alterations.** *Neoplasia* 2008, **10**(6):534-541.
28. Palles C, Cazier JB, Howarth KM, Domingo E, Jones AM, Broderick P, Kemp Z, Spain SL, Guarino E, Salguero I *et al*: **Germline mutations affecting the proofreading domains of POLE and POLD1 predispose to colorectal adenomas and carcinomas.** *Nat Genet* 2013, **45**(2):136-144.
29. Huang S, Zhong X, Gao J, Song R, Wu H, Zi S, Yang S, Du P, Cui L, Yang C *et al*: **Coexpression of SFRP1 and WIF1 as a prognostic predictor of favorable outcomes in patients with colorectal carcinoma.** *Biomed Res Int* 2014, **2014**:256723.
