# Supplementary material for: Exome sequencing characterizes the somatic mutation spectrum of early serrated lesions in a patient with serrated polyposis syndrome (SPS)
Source: PubMed Central journal article supplement (PMC5707812; doi:10.1186/s13053-017-0082-9), 2017-11-29

**Supplementary Fig. S1** Sanger sequencing confirmed the *KRAS G12D* mutation in tumour T69 and the *BRAF V600E* mutation in tumour T71 and T76

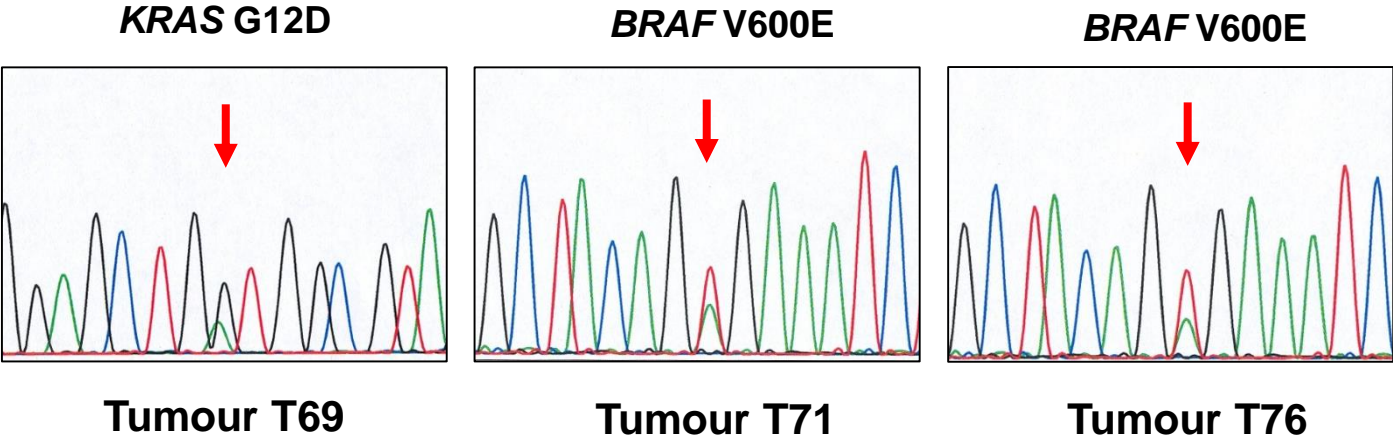

Supplement: 13053_2017_82_MOESM2_ESM.pdf [file 13053_2017_82_MOESM2_ESM.pdf]
